# Supplementary material for: Moderation of Clean Energy Innovation in the Relationship between the Carbon Footprint and Profits in CO₂e-Intensive Firms: A Quantitative Longitudinal Study
Source: Preprints.org preprint supplement (doi:10.20944/preprints202305.2129.v1), 2023-05-30
Supplement: Supplementary file 1 [file supplementary]

## Sheet: APPENDIX A
Appendix A. Mplus-specific syntax for the B-LGC model
Code in Mplus for the B-LGCM	Description of code
TITTLE: Moderating effect analysis based on the Bayesian Latent Growth Curve (LGC) model	Title for the Bayesian analysis to be conducted
DATA: FILE = w_Data2022_7.dat;	Data file to be used; w_Data2022_7.dat is the name of this data file
VARIABLE:
NAMES ARE Firm_ID Sector X11 X12 X13 X14 X15 X16 X17 Z4 Z5 Z6 Z7 Y11 Y12 Y13 Y14 Y15 Y16 Y17;	Name of the seven time points (t=7) of data for observable variables; we called them 'X1t' here to represent seven measures of Scope 1 emissions, 'Zt' for measures of renewable energy consumption (RENC) and, 'Y1t' for the gross profit margin (Pr_Mrg)
USEVAR ARE X11 X12 X13 X14 X15 X16 X17 Z4 Z5 Z6 Z7 Y11 Y12 Y13 Y14 Y15 Y16 Y17;
MISSING ARE ALL (-99);
ANALYSIS:
ESTIMATOR = BAYES;	Request the Bayesian estimator
TYPE = RANDOM;
POINT = MEAN;	Use of mean-centered indicators
CHAINS = 3;
PROCESSORS = 3;
FBITERATIONS = 20000;
BCONVERGENCE = 0.025;
THIN = 30;	By specifying THIN = 30, we request that only every 30th iteration of the post-burn-in phase be used by Mplus to compute the posterior distribution
MODEL:	Specification of the measument model to be tested.
X11-X17*;	Estimation of residual variances for independent variable X1 (Scope 1) for each time point (t=7)
Z1-Z7*;	Estimation of residual variances for moderator variable Z (RENC) for each time point (t=7).
Y11-Y17*;	Estimation of residual variances for dependent variable Y1 (Pr_Mrg) for each time point (t=7).
KSI1 KSI2 | X11@0 X12@1 X13@2 X14@3 X15@4 X16@5 X17@6;	Specification of latent growth curve model with two latent growth parameters, intercepts (KSI1, KSI3 and ETA1) and slopes (KSI2, KSI4 and ETA2). All seven data time points (X11–X17, Z1–Z7, Y11–Y17) are used. The numbers to the right of @ indicate an equal time span between the data points, i.e. 0, 1, 2, 3, 4, 5, 6, and 7 reflect equidistant time points between 2015 and 2021)
KSI3 KSI4 | Z1@0 Z2@1 Z3@2 Z4@3 Z5@4 Z6@5 Z7@6;
ETA1 ETA2 | Y11@0 Y12@1 Y13@2 Y14@3 Y15@4 Y16@5 Y17@6;
KSI1*; KSI2*; KSI3*; KSI4*; ETA1*; ETA2*;	Estimation of variances of latent growth parameters
INT1 | KSI1 XWITH KSI3;	Definition of interaction term (moderation); INT1 corresponds to the latent product variable between the intersections KSI1 and KSI3
INT2 | KSI2 XWITH KSI4;	Definition of interaction term (moderation); INT2 corresponds to the latent product variable between the slopes KSI2 and KSI4
ETA1 ON KSI1 KSI3 INT1;	Structural model specification
ETA2 ON KSI2 KSI4 INT2;	Structural model specification
OUTPUT: CINTERVAL(hpd) TECH8 STDYX;
PLOT: TYPE = PLOT2;
Note: Based on Depaoli et al. (2017).
